# Supplementary material for: High-Stringency Evaluation of the Automated BD Phoenix CPO Detect and Rapidec Carba NP Tests for Detection and Classification of Carbapenemases
Source: PubMed Central journal article supplement (PMC5703810; doi:10.1128/jcm.01215-17), 2017-11-27
Supplement: JCM.01215-17_zjm012175720s1.pdf [file JCM.01215-17_zjm012175720s1.pdf]

**Table S1.** Isolate Information and Results for Rapidec Carba NP (30 minute & 2 hour incubations) and BD Phoenix CPO Detect (Phx) Panels with Carbapenem MICs in µg/ml for Ertapenem (ETP), Imipenem (IPM) & meropenem (MEM)

| Organism                        | Mechanism(s)               | Rapidec 30 mins | Rapidec 2h | Phx Pos/Neg Result | Phx Classification | Phx ETP MIC | Phx IPM MIC | Phx MEM MIC |
|---------------------------------|----------------------------|-----------------|------------|--------------------|--------------------|-------------|-------------|-------------|
| <i>Citrobacter amalonaticus</i> | KPC-2-like                 | +               |            | pos                | A                  | > 1         | > 8         | > 8         |
| <i>C. freundii</i>              | KPC                        | +               |            | neg                | neg                | 1           | 2           | 0.25        |
| <i>C. freundii</i>              | KPC                        | +               |            | pos                | A                  | > 1         | 4           | 8           |
| <i>C. freundii</i>              | KPC-2                      | +               |            | pos                | A                  | > 1         | > 8         | 4           |
| <i>C. freundii</i>              | NDM-1                      | +               |            | pos                | B                  | > 1         | > 8         | > 8         |
| <i>C. freundii</i>              | NDM-1                      | +               |            | pos                | B                  | > 1         | > 8         | > 8         |
| <i>C. freundii</i>              | NDM-1,CTX-M-15,TEM-1,OXA-1 | +               |            | pos                | B                  | > 1         | > 8         | > 8         |
| <i>C. freundii</i> complex      | KPC-3 like                 | +               |            | pos                | A                  | > 1         | 8           | 8           |
| <i>Citrobacter sp.</i>          | NDM                        | +               |            | pos                | B                  | > 1         | > 8         | > 8         |
| <i>C. freundii</i>              | Derepressed AmpC           | -               | -          | neg                | neg                | <=0.25      | 1           | <=0.125     |
| <i>Enterobacter aerogenes</i>   | IMP                        | +               |            | pos                | B                  | > 1         | > 8         | 8           |
| <i>E. aerogenes</i>             | OXA-48                     | -               | +          | pos                | D                  | > 1         | 4           | 2           |
| <i>E. aerogenes</i>             | cAmpC                      | -               | -          | neg                | neg                | > 1         | 1           | 0.5         |
| <i>E. aerogenes</i>             | Hi AmpC                    | -               | +          | pos                | B                  | > 1         | > 8         | > 8         |
| <i>E. aerogenes</i>             | Hi AmpC,SHV-5-like         | -               | +          | neg                | neg                | <=0.25      | 1           | <=0.125     |
| <i>E. cloacae</i>               | KPC-18,VIM-1               | +               |            | pos                | pos - untyped      | > 1         | > 8         | 8           |
| <i>E. cloacae</i>               | KPC-18,VIM-1               | +               |            | pos                | B                  | > 1         | > 8         | > 8         |
| <i>E. cloacae</i>               | IMP-8                      | +               |            | neg                | neg                | 0.5         | 4           | 0.5         |
| <i>E. cloacae</i>               | NDM                        | +               |            | pos                | pos - untyped      | > 1         | > 8         | <=0.125     |
| <i>E. cloacae</i>               | NDM                        | +               |            | pos                | B                  | > 1         | > 8         | > 8         |
| <i>E. cloacae</i>               | NDM                        | +               |            | pos                | B                  | > 1         | > 8         | > 8         |
| <i>E. cloacae</i>               | VIM                        | +               |            | pos                | B                  | > 1         | 8           | > 8         |
| <i>E. cloacae</i>               | IMI                        | +               |            | pos                | A                  | > 1         | > 8         | > 8         |
| <i>E. cloacae</i> complex       | IMI                        | +               |            | pos                | A                  | > 1         | > 8         | > 8         |
| <i>E. cloacae</i>               | KPC                        | +               |            | pos                | A                  | > 1         | > 8         | > 8         |
| <i>E. cloacae</i>               | KPC                        | +               |            | pos                | A                  | > 1         | 4           | 2           |
| <i>E. cloacae</i>               | KPC                        | -               | +          | pos                | A                  | > 1         | > 8         | 8           |

| Organism                | Mechanism(s)          | Rapidec<br>30 mins | Rapidec<br>2h | Phx<br>Pos/Neg<br>Result | Phx<br>Classification | Phx ETP<br>MIC | Phx<br>IPM<br>MIC | Phx<br>MEM<br>MIC |
|-------------------------|-----------------------|--------------------|---------------|--------------------------|-----------------------|----------------|-------------------|-------------------|
| <i>E. cloacae</i>       | KPC                   | -                  | (w)*          | pos                      | A                     | 1              | 4                 | 0.5               |
| <i>E. cloacae</i>       | KPC                   | +                  |               | pos                      | A                     | >1             | >8                | >8                |
| <i>E. cloacae</i>       | KPC; CTX-M-1; ACT/MIR | +                  |               | pos                      | A                     | >1             | 8                 | 4                 |
| <i>E. cloacae</i>       | KPC                   | +                  |               | pos                      | A                     | >1             | 8                 | 8                 |
| <i>E. cloacae</i>       | KPC                   | +                  |               | pos                      | A                     | >1             | 4                 | >8                |
| <i>E. cloacae</i>       | KPC                   | +                  |               | pos                      | A                     | >1             | 8                 | 8                 |
| <i>E. cloacae</i>       | KPC                   | -                  | +             | pos                      | A                     | >1             | 8                 | 4                 |
| <i>E. cloacae</i>       | KPC                   | -                  | +             | pos                      | A                     | >1             | 8                 | 8                 |
| <i>E. cloacae</i>       | KPC                   | +                  |               | pos                      | A                     | >1             | >8                | >8                |
| <i>E. cloacae</i>       | KPC                   | +                  |               | pos                      | A                     | >1             | >8                | >8                |
| <i>E. cloacae</i>       | KPC-2                 | +                  |               | pos                      | A                     | >1             | >8                | >8                |
| <i>E. cloacae</i>       | KPC-2-like            | +                  |               | pos                      | A                     | >1             | 2                 | 2                 |
| <i>E. cloacae</i>       | KPC-2-like            | +                  |               | pos                      | A                     | >1             | >8                | >8                |
| <i>E. cloacae</i>       | KPC-2-like            | +                  |               | pos                      | A                     | >1             | 1                 | 1                 |
| <i>E. cloacae</i>       | KPC-2-like            | +                  |               | pos                      | A                     | >1             | 8                 | 4                 |
| <i>E. cloacae</i>       | KPC-3 TEM-1           | +                  |               | pos                      | A                     | >1             | 8                 | 8                 |
| <i>E. cloacae</i>       | KPC 3 TEM-1           | +                  |               | pos                      | B                     | >1             | 4                 | 2                 |
| <i>E. cloacae</i>       | NMC-A                 | +                  |               | pos                      | A                     | >1             | >8                | >8                |
| <i>E. cloacae</i>       | cAmpC                 | +                  |               | neg                      | neg                   | >1             | 1                 | 0.5               |
| <i>E. cloacae</i>       | cAmpC                 | -                  | -             | neg                      | neg                   | >1             | NONE              | 2                 |
| <i>E. cloacae</i>       | cAmpC                 | -                  | -             | neg                      | neg                   | 1              | 1                 | 0.25              |
| <i>E. cloacae</i>       | cAmpC                 | -                  | (w)           | neg                      | neg                   | <=0.25         | <=0.25            | <=0.125           |
| <i>E. cloacae</i>       | Hi AmpC               | -                  | -             | pos                      | B                     | >1             | >8                | >8                |
| <i>E. cloacae</i>       | Hi AmpC               | -                  | -             | neg                      | neg                   | >1             | >8                | 8                 |
| <i>E. cloacae</i>       | Hi AmpC               | -                  | +             | pos                      | B                     | >1             | >8                | >8                |
| <i>Escherichia coli</i> | NDM                   | +                  |               | pos                      | B                     | >1             | >8                | >8                |
| <i>E. coli</i>          | NDM                   | +                  |               | pos                      | B                     | >1             | >8                | >8                |
| <i>E. coli</i>          | NDM                   | +                  |               | pos                      | B                     | >1             | >8                | >8                |
| <i>E. coli</i>          | NDM                   | +                  |               | pos                      | B                     | >1             | >8                | >8                |

| Organism       | Mechanism(s)             | Rapidec<br>30 mins | Rapidec<br>2h | Phx<br>Pos/Neg<br>Result | Phx<br>Classification | Phx ETP<br>MIC | Phx<br>IPM<br>MIC | Phx<br>MEM<br>MIC |
|----------------|--------------------------|--------------------|---------------|--------------------------|-----------------------|----------------|-------------------|-------------------|
| <i>E. coli</i> | NDM                      | +                  |               | pos                      | D                     | > 1            | > 8               | > 8               |
| <i>E. coli</i> | NDM-1                    | +                  |               | pos                      | B                     | > 1            | > 8               | > 8               |
| <i>E. coli</i> | NDM-1,CTX-M-15           | +                  |               | pos                      | B                     | > 1            | > 8               | > 8               |
| <i>E. coli</i> | NDM-1,CTX-M-15,<br>TEM-1 | +                  |               | pos                      | B                     | > 1            | > 8               | > 8               |
| <i>E. coli</i> | NDM, CTX-M-1             | +                  |               | pos                      | B                     | > 1            | > 8               | > 8               |
| <i>E. coli</i> | NDM                      | +                  |               | pos                      | B                     | > 1            | > 8               | > 8               |
| <i>E. coli</i> | NDM-1                    | +                  |               | pos                      | B                     | > 1            | > 8               | > 8               |
| <i>E. coli</i> | NDM-5                    | +                  |               | pos                      | B                     | > 1            | > 8               | > 8               |
| <i>E. coli</i> | NDM-5                    | +                  |               | pos                      | B                     | > 1            | > 8               | > 8               |
| <i>E. coli</i> | NDM-6                    | +                  |               | pos                      | D                     | > 1            | > 8               | > 8               |
| <i>E. coli</i> | KPC                      | +                  |               | pos                      | A                     | > 1            | 4                 | 8                 |
| <i>E. coli</i> | KPC                      | -                  | (w)           | pos                      | A                     | > 1            | > 8               | 2                 |
| <i>E. coli</i> | KPC-3                    | +                  |               | pos                      | A                     | > 1            | 4                 | 2                 |
| <i>E. coli</i> | KPC-3 TEM-1              | +                  |               | pos                      | A                     | > 1            | 4                 | 8                 |
| <i>E. coli</i> | KPC-3 like               | +                  |               | pos                      | A                     | > 1            | 8                 | 8                 |
| <i>E. coli</i> | KPC-3 like               | +                  |               | pos                      | A                     | > 1            | 8                 | 4                 |
| <i>E. coli</i> | CMY-2 type               | -                  | -             | neg                      | neg                   | <=0.25         | > 8               | > 8               |
| <i>E. coli</i> | CMY-2 type               | -                  | -             | neg                      | neg                   | <=0.25         | 0.5               | <=0.125           |
| <i>E. coli</i> | Hi AmpC                  | -                  | +             | neg                      | neg                   | <=0.25         | <=0.25            | <=0.125           |
| <i>E. coli</i> | Hi AmpC,TEM-1-like       | -                  | +             | neg                      | neg                   | > 1            | > 8               | 4                 |
| <i>E. coli</i> | Hi AmpC, SHV-12 like     | -                  | +             | pos                      | B                     | > 1            | > 8               | > 8               |
| <i>E. coli</i> | DHA-like                 | -                  | -             | neg                      | neg                   | > 1            | > 8               | 2                 |
| <i>E. coli</i> | cAmpC                    | -                  | +             | neg                      | neg                   | <=0.25         | <=0.25            | <=0.125           |
| <i>E. coli</i> | Hi AmpC                  | -                  | +             | pos                      | B                     | > 1            | > 8               | > 8               |
| <i>E. coli</i> | LAT-4                    | -                  | +             | neg                      | neg                   | 0.5            | 1                 | <=0.125           |
| <i>E. coli</i> | Hi AmpC,TEM-1-like       | -                  | +             | neg                      | neg                   | > 1            | > 8               | 2                 |
| <i>E. coli</i> | CMY-2                    | -                  | -             | neg                      | neg                   | <=0.25         | 0.5               | <=0.125           |
| <i>E. coli</i> | CMY-2                    | -                  | -             | neg                      | neg                   | > 1            | 2                 | 2                 |
| <i>E. coli</i> | CTX-M-12                 | -                  | +             | neg                      | neg                   | <=0.25         | <=0.25            | <=0.125           |

| Organism                  | Mechanism(s)                       | Rapidec 30 mins | Rapidec 2h | Phx Pos/Neg Result | Phx Classification | Phx ETP MIC | Phx IPM MIC | Phx MEM MIC |
|---------------------------|------------------------------------|-----------------|------------|--------------------|--------------------|-------------|-------------|-------------|
| <i>E. coli</i>            | 164S (TEM)                         | -               | +          | neg                | neg                | <=0.25      | 0.5         | <=0.125     |
| <i>E. coli</i>            | CTX-M9                             | -               | -          | pos                | B                  | > 1         | > 8         | > 8         |
| <i>E. coli</i>            | ESBL                               | -               | +          | pos                | D                  | > 1         | <=0.25      | 0.5         |
| <i>E. coli</i>            | High TEM-1                         | -               | -          | neg                | neg                | <=0.25      | <=0.25      | <=0.125     |
| <i>Hafnia alvei</i>       | KPC                                | +               |            | pos                | A                  | > 1         | 8           | 2           |
| <i>Klebsiella oxytoca</i> | KPC                                | +               |            | neg                | neg                | > 1         | > 8         | > 8         |
| <i>K. oxytoca</i>         | KPC                                | +               |            | pos                | A                  | > 1         | 8           | 8           |
| <i>K. oxytoca</i>         | KPC                                | +               |            | pos                | A                  | > 1         | 8           | 8           |
| <i>K. oxytoca</i>         | KPC                                | -               | +          | pos                | pos - untyped      | > 1         | > 8         | > 8         |
| <i>K. oxytoca</i>         | DHA-like, SHV ESBL, TEM-1-like, K1 | -               | -          | neg                | neg                | <=0.25      | 0.5         | <=0.125     |
| <i>K. oxytoca</i>         | K1 hyperproducer                   | -               | -          | neg                | neg                | <=0.25      | 0.5         | <=0.125     |
| <i>K. ozaenae</i>         | KPC                                | +               |            | pos                | B                  | > 1         | > 8         | > 8         |
| <i>K. ozaenae</i>         | OXA-181                            | -               | (w)        | pos                | D                  | > 1         | 8           | 8           |
| <i>K. pneumoniae</i>      | IMP                                | -               | +          | pos                | B                  | > 1         | > 8         | > 8         |
| <i>K. pneumoniae</i>      | IMP                                | +               |            | pos                | pos - untyped      | > 1         | 8           | > 8         |
| <i>K. pneumoniae</i>      | IMP-8                              | +               |            | pos                | B                  | > 1         | 8           | 4           |
| <i>K. pneumoniae</i>      | NDM-1                              | +               |            | pos                | pos - untyped      | > 1         | > 8         | > 8         |
| <i>K. pneumoniae</i>      | NDM                                | +               |            | pos                | B                  | > 1         | > 8         | > 8         |
| <i>K. pneumoniae</i>      | NDM                                | +               |            | pos                | B                  | > 1         | > 8         | > 8         |
| <i>K. pneumoniae</i>      | NDM                                | +               |            | pos                | B                  | > 1         | > 8         | > 8         |
| <i>K. pneumoniae</i>      | NDM, OXA-181                       | +               |            | pos                | D                  | > 1         | > 8         | 8           |
| <i>K. pneumoniae</i>      | NDM, OXA-232                       | +               |            | pos                | D                  | > 1         | > 8         | > 8         |
| <i>K. pneumoniae</i>      | NDM                                | +               |            | pos                | B                  | > 1         | > 8         | > 8         |
| <i>K. pneumoniae</i>      | NDM                                | +               |            | pos                | B                  | > 1         | > 8         | > 8         |
| <i>K. pneumoniae</i>      | NDM                                | +               |            | pos                | B                  | > 1         | > 8         | > 8         |
| <i>K. pneumoniae</i>      | NDM                                | +               |            | pos                | pos - untyped      | > 1         | > 8         | > 8         |
| <i>K. pneumoniae</i>      | NDM                                | +               |            | pos                | pos - untyped      | > 1         | > 8         | > 8         |
| <i>K. pneumoniae</i>      | NDM                                | +               |            | pos                | pos - untyped      | > 1         | > 8         | > 8         |
| <i>K. pneumoniae</i>      | NDM-1                              | +               |            | pos                | B                  | > 1         | > 8         | > 8         |



| Organism             | Mechanism(s) | Rapidec<br>30 mins | Rapidec<br>2h | Phx<br>Pos/Neg<br>Result | Phx<br>Classification | Phx ETP<br>MIC | Phx<br>IPM<br>MIC | Phx<br>MEM<br>MIC |
|----------------------|--------------|--------------------|---------------|--------------------------|-----------------------|----------------|-------------------|-------------------|
| <i>K. pneumoniae</i> | KPC          | +                  |               | pos                      | pos - untyped         | > 1            | > 8               | > 8               |
| <i>K. pneumoniae</i> | KPC          | +                  |               | pos                      | pos - untyped         | > 1            | > 8               | > 8               |
| <i>K. pneumoniae</i> | KPC          | +                  |               | pos                      | A                     | > 1            | 4                 | NONE              |
| <i>K. pneumoniae</i> | KPC          | +                  |               | pos                      | A                     | > 1            | > 8               | > 8               |
| <i>K. pneumoniae</i> | KPC          | +                  |               | pos                      | A                     | > 1            | > 8               | 8                 |
| <i>K. pneumoniae</i> | KPC          | +                  |               | pos                      | A                     | > 1            | 4                 | 2                 |
| <i>K. pneumoniae</i> | KPC          | -                  | +             | pos                      | A                     | > 1            | > 8               | > 8               |
| <i>K. pneumoniae</i> | KPC          | +                  |               | pos                      | A                     | > 1            | 8                 | > 8               |
| <i>K. pneumoniae</i> | KPC          | +                  |               | pos                      | A                     | > 1            | > 8               | > 8               |
| <i>K. pneumoniae</i> | KPC          | +                  |               | pos                      | A                     | > 1            | > 8               | > 8               |
| <i>K. pneumoniae</i> | KPC          | +                  |               | pos                      | A                     | > 1            | 8                 | > 8               |
| <i>K. pneumoniae</i> | KPC-2-like   | +                  |               | pos                      | A                     | > 1            | > 8               | > 8               |
| <i>K. pneumoniae</i> | KPC-2-like   | +                  |               | pos                      | A                     | > 1            | > 8               | > 8               |
| <i>K. pneumoniae</i> | KPC-2-like   | +                  |               | pos                      | A                     | > 1            | > 8               | > 8               |
| <i>K. pneumoniae</i> | KPC-2-like   | +                  |               | pos                      | A                     | > 1            | > 8               | > 8               |
| <i>K. pneumoniae</i> | KPC-2-like   | +                  |               | pos                      | A                     | > 1            | 8                 | 8                 |
| <i>K. pneumoniae</i> | KPC-2-like   | +                  |               | pos                      | A                     | > 1            | > 8               | > 8               |
| <i>K. pneumoniae</i> | KPC-2-like   | +                  |               | pos                      | A                     | > 1            | 8                 | 4                 |
| <i>K. pneumoniae</i> | KPC-2-like   | +                  |               | pos                      | A                     | > 1            | > 8               | > 8               |
| <i>K. pneumoniae</i> | KPC-2-like   | +                  |               | pos                      | A                     | > 1            | > 8               | > 8               |
| <i>K. pneumoniae</i> | KPC-2-like   | +                  |               | pos                      | A                     | > 1            | 8                 | 4                 |
| <i>K. pneumoniae</i> | KPC-2        | +                  |               | pos                      | A                     | > 1            | > 8               | > 8               |
| <i>K. pneumoniae</i> | KPC-3        | +                  |               | pos                      | A                     | > 1            | > 8               | > 8               |
| <i>K. pneumoniae</i> | KPC-3        | +                  |               | pos                      | pos - untyped         | > 1            | > 8               | > 8               |
| <i>K. pneumoniae</i> | KPC-3        | +                  |               | pos                      | A                     | > 1            | 8                 | > 8               |
| <i>K. pneumoniae</i> | KPC-3        | +                  |               | pos                      | A                     | > 1            | > 8               | > 8               |
| <i>K. pneumoniae</i> | KPC-3        | +                  |               | pos                      | A                     | > 1            | > 8               | > 8               |
| <i>K. pneumoniae</i> | KPC-3        | +                  |               | pos                      | A                     | > 1            | > 8               | > 8               |
| <i>K. pneumoniae</i> | KPC-2        | +                  |               | pos                      | A                     | > 1            | > 8               | > 8               |
| <i>K. pneumoniae</i> | KPC-3        | +                  |               | pos                      | A                     | > 1            | > 8               | > 8               |
| <i>K. pneumoniae</i> | KPC-3        | +                  |               | pos                      | A                     | > 1            | > 8               | > 8               |

| Organism             | Mechanism(s)                                   | Rapidec<br>30 mins | Rapidec<br>2h | Phx<br>Pos/Neg<br>Result | Phx<br>Classification | Phx ETP<br>MIC | Phx<br>IPM<br>MIC | Phx<br>MEM<br>MIC |
|----------------------|------------------------------------------------|--------------------|---------------|--------------------------|-----------------------|----------------|-------------------|-------------------|
| <i>K. pneumoniae</i> | KPC-2, SHV-5-like,TEM-1-like                   | +                  |               | pos                      | pos - untyped         | > 1            | > 8               | > 8               |
| <i>K. pneumoniae</i> | KPC-3 like                                     | +                  |               | pos                      | A                     | > 1            | 8                 | > 8               |
| <i>K. pneumoniae</i> | KPC-3,SHV-12-like,SHV-1, OXA-9-like,TEM-1-like | +                  |               | pos                      | A                     | > 1            | 4                 | 4                 |
| <i>K. pneumoniae</i> | KPC-4                                          | -                  | +             | pos                      | A                     | > 1            | 1                 | 0.5               |
| <i>K. pneumoniae</i> | KPC-4                                          | -                  | +             | neg                      | neg                   | > 1            | 4                 | 2                 |
| <i>K. pneumoniae</i> | KPC-6                                          | +                  |               | pos                      | A                     | > 1            | 4                 | 4                 |
| <i>K. pneumoniae</i> | KPC-8                                          | +                  |               | pos                      | pos - untyped         | > 1            | > 8               | > 8               |
| <i>K. pneumoniae</i> | KPC-8                                          | +                  |               | pos                      | pos - untyped         | > 1            | > 8               | > 8               |
| <i>K. pneumoniae</i> | OXA-48                                         | +                  |               | pos                      | D                     | > 1            | 4                 | 2                 |
| <i>K. pneumoniae</i> | OXA-48                                         | -                  | +             | pos                      | D                     | > 1            | > 8               | 8                 |
| <i>K. pneumoniae</i> | OXA-48                                         | -                  | +             | pos                      | D                     | > 1            | 4                 | 2                 |
| <i>K. pneumoniae</i> | OXA-48                                         | -                  | +             | pos                      | D                     | > 1            | 4                 | 1                 |
| <i>K. pneumoniae</i> | OXA-48                                         | -                  | +             | pos                      | D                     | > 1            | > 8               | > 8               |
| <i>K. pneumoniae</i> | OXA-48                                         | -                  | +             | pos                      | D                     | > 1            | > 8               | > 8               |
| <i>K. pneumoniae</i> | OXA-48                                         | -                  | +             | pos                      | D                     | > 1            | > 8               | > 8               |
| <i>K. pneumoniae</i> | OXA-48                                         | -                  | +             | pos                      | D                     | > 1            | 4                 | 2                 |
| <i>K. pneumoniae</i> | OXA-48                                         | -                  | +             | pos                      | D                     | > 1            | 2                 | 2                 |
| <i>K. pneumoniae</i> | OXA-48                                         | -                  | -             | pos                      | D                     | > 1            | 4                 | 4                 |
| <i>K. pneumoniae</i> | OXA-48                                         | -                  | +             | pos                      | D                     | > 1            | 4                 | 8                 |
| <i>K. pneumoniae</i> | OXA-48                                         | -                  | +             | pos                      | D                     | > 1            | > 8               | > 8               |
| <i>K. pneumoniae</i> | OXA-181                                        | -                  | +             | pos                      | D                     | > 1            | 8                 | 4                 |
| <i>K. pneumoniae</i> | OXA-181                                        | -                  | +             | pos                      | D                     | > 1            | 4                 | 4                 |
| <i>K. pneumoniae</i> | OXA-181                                        | +                  |               | pos                      | D                     | > 1            | 4                 | 2                 |
| <i>K. pneumoniae</i> | OXA-181                                        | -                  | -             | pos                      | D                     | > 1            | 4                 | 4                 |
| <i>K. pneumoniae</i> | OXA-232                                        | -                  | +             | pos                      | D                     | > 1            | 8                 | > 8               |
| <i>K. pneumoniae</i> | OXA-232                                        | -                  | +             | pos                      | D                     | > 1            | > 8               | > 8               |
| <i>K. pneumoniae</i> | OXA-181                                        | +                  |               | pos                      | D                     | > 1            | > 8               | > 8               |
| <i>K. pneumoniae</i> | LAT-4                                          | -                  | -             | neg                      | neg                   | 0.5            | 0.5               | <=0.125           |

| Organism                   | Mechanism(s)                    | Rapidec 30 mins | Rapidec 2h | Phx Pos/Neg Result | Phx Classification | Phx ETP MIC | Phx IPM MIC | Phx MEM MIC |
|----------------------------|---------------------------------|-----------------|------------|--------------------|--------------------|-------------|-------------|-------------|
| <i>K. pneumoniae</i>       | FOX-5, SHV-4 like               | -               | -          | neg                | neg                | <=0.25      | <=0.25      | <=0.125     |
| <i>K. pneumoniae</i>       | TEM-1,SHV-1, OXA-9, SHV-5 ACT-1 | -               | -          | neg                | neg                | 0.5         | 2           | <=0.125     |
| <i>K. pneumoniae</i>       | CMY-2-like                      | -               | -          | pos                | pos - untyped      | > 1         | > 8         | > 8         |
| <i>K. pneumoniae</i>       | CMY-2, SHV-1, TEM-1-like        | -               | -          | neg                | neg                | <=0.25      | <=0.25      | <=0.125     |
| <i>K. pneumoniae</i>       | MOX-1                           | -               | -          | neg                | neg                | > 1         | <=0.25      | 0.25        |
| <i>K. pneumoniae</i>       | FOX-1                           | -               | -          | neg                | neg                | <=0.25      | <=0.25      | <=0.125     |
| <i>K. pneumoniae</i>       | SHV-18                          | U               | U          | neg                | neg                | <=0.25      | <=0.25      | <=0.125     |
| <i>K. pneumoniae</i>       | CTX-M28, OMPK36, OMPK-35        | +               |            | pos                | pos - untyped      | > 1         | 1           | 4           |
| <i>K. pneumoniae</i>       | SHV-12, OMPK-36                 | -               | -          | pos                | B                  | > 1         | > 8         | > 8         |
| <i>K. pneumoniae</i>       | OMP-K35                         | -               | +          | pos                | pos - untyped      | > 1         | > 8         | > 8         |
| <i>K. pneumoniae</i>       | CTX-M14; DHA-1, OMPK35          | -               | -          | pos                | pos - untyped      | > 1         | > 8         | > 8         |
| <i>K. pneumoniae</i>       | SHV                             | -               | -          | neg                | neg                | <=0.25      | <=0.25      | <=0.125     |
| <i>K. pneumoniae</i>       | CTX-M2, OMPK-36                 | -               | -          | pos                | pos - untyped      | > 1         | 8           | > 8         |
| <i>K. pneumoniae</i>       | TEM-1, SHV-1, CTX-M-15          | -               | -          | pos                | pos - untyped      | > 1         | 4           | 8           |
| <i>K. pneumoniae</i>       | TEM-1, SHV-1, CTX-M-15          | -               | +          | pos                | pos - untyped      | > 1         | > 8         | > 8         |
| <i>Kluyvera ascorbata</i>  | KPC                             | +               |            | pos                | pos - untyped      | > 1         | > 8         | > 8         |
| <i>Morganella morganii</i> | NDM                             | +               |            | pos                | pos - untyped      | > 1         | > 8         | 4           |
| <i>M. morganii</i>         | KPC                             | (w)             | +          | pos                | A                  | > 1         | > 8         | 4           |
| <i>M. morganii</i>         | Inducible AmpC                  | -               | +          | neg                | neg                | <=0.25      | 4           | <=0.125     |
| <i>M. morganii</i>         | Derepressed AmpC                | +               |            | pos                | pos - untyped      | > 1         | 4           | 4           |
| <i>Proteus mirabilis</i>   | IMP-27                          | -               | +          | neg                | neg                | > 1         | 8           | > 8         |
| <i>P. mirabilis</i>        | NDM                             | -               | +          | pos                | B                  | > 1         | > 8         | > 8         |
| <i>P. mirabilis</i>        | KPC                             | -               | +          | pos                | pos - untyped      | > 1         | > 8         | 8           |
| <i>P. mirabilis</i>        | KPC                             | -               | +          | pos                | B                  | 0.5         | 8           | 0.25        |



| Organism                          | Mechanism(s)         | Rapidec 30 mins | Rapidec 2h | Phx Pos/Neg Result | Phx Classification | Phx ETP MIC | Phx IPM MIC | Phx MEM MIC |
|-----------------------------------|----------------------|-----------------|------------|--------------------|--------------------|-------------|-------------|-------------|
| <i>P. mirabilis</i>               | CMY-like, TEM-1-like | -               | -          | pos                | B                  | <=0.25      | 8           | <=0.125     |
| <i>Providencia rettgeri</i>       | NDM                  | -               | +          | pos                | B                  | > 1         | > 8         | > 8         |
| <i>P. rettgeri</i>                | NDM-1                | -               | +          | pos                | B                  | > 1         | > 8         | > 8         |
| <i>Raoultella ornithinolytica</i> | KPC                  | +               |            | pos                | A                  | > 1         | 8           | 4           |
| <i>Salmonella senftenberg</i>     | NDM                  | +               |            | pos                | B                  | > 1         | > 8         | > 8         |
| <i>Serratia marcescens</i>        | IMP-1                | +               |            | pos                | pos - untyped      | > 1         | > 8         | > 8         |
| <i>S. marcescens</i>              | NDM-1                | +               |            | pos                | B                  | > 1         | > 8         | > 8         |
| <i>S. marcescens</i>              | KPC                  | +               |            | pos                | pos - untyped      | > 1         | > 8         | > 8         |
| <i>S. marcescens</i>              | SME                  | +               |            | pos                | A                  | > 1         | > 8         | > 8         |
| <i>S. marcescens</i>              | SME                  | (w)             | +          | pos                | A                  | > 1         | > 8         | > 8         |
| <i>S. marcescens</i>              | SME                  | +               |            | pos                | A                  | > 1         | > 8         | > 8         |
| <i>S. marcescens</i>              | SME                  | +               |            | pos                | A                  | > 1         | > 8         | > 8         |
| <i>S. marcescens</i>              | SME                  | +               |            | pos                | A                  | > 1         | > 8         | > 8         |
| <i>S. marcescens</i>              | SME                  | +               |            | pos                | A                  | > 1         | > 8         | > 8         |
| <i>S. marcescens</i>              | SME-like             | +               |            | pos                | A                  | > 1         | > 8         | > 8         |
| <i>S. marcescens</i>              | SME-like             | +               |            | pos                | A                  | > 1         | > 8         | > 8         |
| <i>S. marcescens</i>              | SME                  | +               |            | pos                | A                  | > 1         | > 8         | > 8         |
| <i>S. marcescens</i>              | SME                  | +               |            | pos                | A                  | > 1         | > 8         | 8           |
| <i>S. marcescens</i>              | SHV-7                | -               | -          | neg                | neg                | 0.5         | 1           | <=0.125     |
| <i>Acinetobacter baumannii</i>    | IMP-1                | +               |            | pos                | B                  | > 1         | > 8         | > 8         |
| <i>A. baumannii</i>               | IMP-4                | +               |            | pos                | B                  | > 1         | > 8         | > 8         |
| <i>A. baumannii</i>               | NDM-1                | +               |            | pos                | B                  | > 1         | > 8         | > 8         |
| <i>A. baumannii</i>               | NDM-1                | +               |            | pos                | pos - untyped      | > 1         | > 8         | > 8         |
| <i>A. baumannii</i>               | NDM-1                | +               |            | pos                | B                  | > 1         | > 8         | > 8         |
| <i>A. baumannii</i>               | OXA-23, NDM          | +               |            | pos                | D                  | > 1         | > 8         | > 8         |
| <i>A. baumannii</i>               | VIM-2                | +               |            | pos                | pos - untyped      | > 1         | > 8         | > 8         |
| <i>A. baumannii</i>               | VIM-2                | -               | +          | pos                | pos - untyped      | > 1         | > 8         | > 8         |
| <i>A. baumannii</i>               | KPC                  | -               | +          | pos                | D                  | > 1         | > 8         | > 8         |
| <i>A. baumannii</i>               | OXA 23               | -               | (w)        | pos                | D                  | > 1         | > 8         | > 8         |
| <i>A. baumannii</i>               | OXA-23               | -               | (w)        | pos                | D                  | > 1         | > 8         | > 8         |

| Organism                      | Mechanism(s)   | Rapidec<br>30 mins | Rapidec<br>2h | Phx<br>Pos/Neg<br>Result | Phx<br>Classification | Phx ETP<br>MIC | Phx<br>IPM<br>MIC | Phx<br>MEM<br>MIC |
|-------------------------------|----------------|--------------------|---------------|--------------------------|-----------------------|----------------|-------------------|-------------------|
| <i>A. baumannii</i>           | OXA-23         | -                  | +             | pos                      | D                     | > 1            | > 8               | > 8               |
| <i>A. baumannii</i>           | OXA-23         | -                  | +             | pos                      | D                     | > 1            | > 8               | > 8               |
| <i>A. baumannii</i>           | OXA-23         | -                  | +             | pos                      | D                     | > 1            | > 8               | > 8               |
| <i>A. baumannii</i>           | OXA-23         | -                  | +             | pos                      | D                     | > 1            | > 8               | > 8               |
| <i>A. baumannii</i>           | OXA-23         | -                  | +             | pos                      | D                     | > 1            | > 8               | > 8               |
| <i>A. baumannii</i>           | OXA-23         | -                  | +             | pos                      | D                     | > 1            | > 8               | > 8               |
| <i>A. baumannii</i>           | OXA-23, OXA-40 | -                  | (w)           | pos                      | pos - untyped         | > 1            | > 8               | > 8               |
| <i>A. baumannii</i>           | OXA-40         | -                  | (w)           | pos                      | pos - untyped         | > 1            | > 8               | > 8               |
| <i>A. baumannii</i>           | OXA-40         | -                  | +             | pos                      | A                     | > 1            | > 8               | > 8               |
| <i>A. baumannii</i>           | OXA-40         | -                  | +             | pos                      | pos - untyped         | > 1            | > 8               | > 8               |
| <i>A. baumannii</i>           | OXA-58         | -                  | +             | pos                      | B                     | > 1            | > 8               | 8                 |
| <i>A. baumannii</i>           | OXA 58         | -                  | +             | pos                      | D                     | > 1            | > 8               | 8                 |
| <i>A. baumannii</i>           | OXA-72         | -                  | (w)           | pos                      | D                     | > 1            | > 8               | > 8               |
| <i>Pseudomonas aeruginosa</i> | IMP-1          | +                  |               | pos                      | B                     | > 1            | > 8               | > 8               |
| <i>P. aeruginosa</i>          | IMP-7          | +                  |               | pos                      | pos - untyped         | > 1            | > 8               | > 8               |
| <i>P. aeruginosa</i>          | IMP-7          | +                  |               | pos                      | B                     | > 1            | > 8               | > 8               |
| <i>P. aeruginosa</i>          | IMP-7          | +                  |               | pos                      | B                     | > 1            | > 8               | > 8               |
| <i>P. aeruginosa</i>          | IMP-14         | +                  |               | pos                      | pos - untyped         | > 1            | > 8               | > 8               |
| <i>P. aeruginosa</i>          | IMP-18         | +                  |               | pos                      | pos - untyped         | > 1            | > 8               | > 8               |
| <i>P. aeruginosa</i>          | SPM            | +                  |               | pos                      | pos - untyped         | > 1            | > 8               | > 8               |
| <i>P. aeruginosa</i>          | SPM-1          | +                  |               | pos                      | pos - untyped         | > 1            | > 8               | > 8               |
| <i>P. aeruginosa</i>          | VIM            | +                  |               | pos                      | B                     | > 1            | > 8               | > 8               |
| <i>P. aeruginosa</i>          | VIM            | (w)                | +             | pos                      | B                     | > 1            | > 8               | > 8               |
| <i>P. aeruginosa</i>          | VIM            | (w)                | +             | pos                      | B                     | > 1            | > 8               | > 8               |
| <i>P. aeruginosa</i>          | VIM            | +                  |               | neg                      | pos - untyped         | > 1            | > 8               | 4                 |
| <i>P. aeruginosa</i>          | VIM            | +                  |               | neg                      | neg                   | > 1            | > 8               | 4                 |
| <i>P. aeruginosa</i>          | VIM-2          | (w)                | +             | pos                      | B                     | > 1            | > 8               | > 8               |
| <i>P. aeruginosa</i>          | VIM-2          | -                  | +             | pos                      | B                     | > 1            | > 8               | > 8               |
| <i>P. aeruginosa</i>          | VIM-2          | -                  | +             | pos                      | B                     | > 1            | > 8               | > 8               |
| <i>P. aeruginosa</i>          | VIM-2          | -                  | +             | pos                      | B                     | > 1            | > 8               | > 8               |

| Organism             | Mechanism(s)  | Rapidec<br>30 mins | Rapidec<br>2h | Phx<br>Pos/Neg<br>Result | Phx<br>Classification | Phx ETP<br>MIC | Phx<br>IPM<br>MIC | Phx<br>MEM<br>MIC |
|----------------------|---------------|--------------------|---------------|--------------------------|-----------------------|----------------|-------------------|-------------------|
| <i>P. aeruginosa</i> | VIM-2         | -                  | +             | pos                      | B                     | > 1            | > 8               | > 8               |
| <i>P. aeruginosa</i> | VIM-2         | -                  | +             | pos                      | B                     | > 1            | > 8               | > 8               |
| <i>P. aeruginosa</i> | VIM-2         | +                  |               | pos                      | B                     | > 1            | > 8               | > 8               |
| <i>P. aeruginosa</i> | VIM-2         | -                  | +             | neg                      | neg                   | > 1            | > 8               | 4                 |
| <i>P. aeruginosa</i> | VIM-3         | +                  |               | pos                      | B                     | > 1            | > 8               | > 8               |
| <i>P. aeruginosa</i> | VIM-4         | +                  |               | pos                      | B                     | > 1            | > 8               | > 8               |
| <i>P. aeruginosa</i> | VIM-7, OXA-45 | +                  |               | pos                      | pos - untyped         | > 1            | > 8               | > 8               |
| <i>P. aeruginosa</i> | KPC           | +                  |               | pos                      | A                     | > 1            | > 8               | > 8               |
| <i>P. aeruginosa</i> | KPC           | +                  |               | pos                      | A                     | > 1            | > 8               | > 8               |
| <i>P. aeruginosa</i> | KPC-5         | +                  |               | pos                      | A                     | > 1            | > 8               | > 8               |
| <i>P. aeruginosa</i> | KPC-5         | +                  |               | pos                      | A                     | > 1            | > 8               | > 8               |

(w)\*, borderline result

U\*, uninterpretable test
